# Supplementary material
Source: PubMed Central journal article supplement (PMC2940521)
Supplement: en.2009-1356_1.pdf [file en.2009-1356_1.pdf]

**Fig. 1: Summary of S-nitrosoprotein labeling and detection approaches.** A protein is indicated schematically with cysteines in the thiol, disulfide, and nitrosothiol states. First, free thiols (-SH) are rendered as inactive by methylthiolation with methanethiosulfonate (MMTS). Second, nitrosothiols (-SNO) are selectively reduced with ascorbate and converted to -SH. Third, the converted -SH is labeled with the thiol-modifying reagents, including biotin-HPDP, MTSEA-Texas Red or Cydye fluor. Biotin-labeled nitrosoproteins are detected by immunoblotting with an anti-biotin antibody or captured by avidin and then analyzed by specific antibody against each protein of interest. MTSEA-Texas Red labeled intact cells can be visualized by fluorescence microscopy. Cydye fluor (Cy3 and Cy5) labeling coupled with 2D-DIGE can be used for proteomic analysis and nitrosoproteins identification by mass spectrometry.

Fig. 1

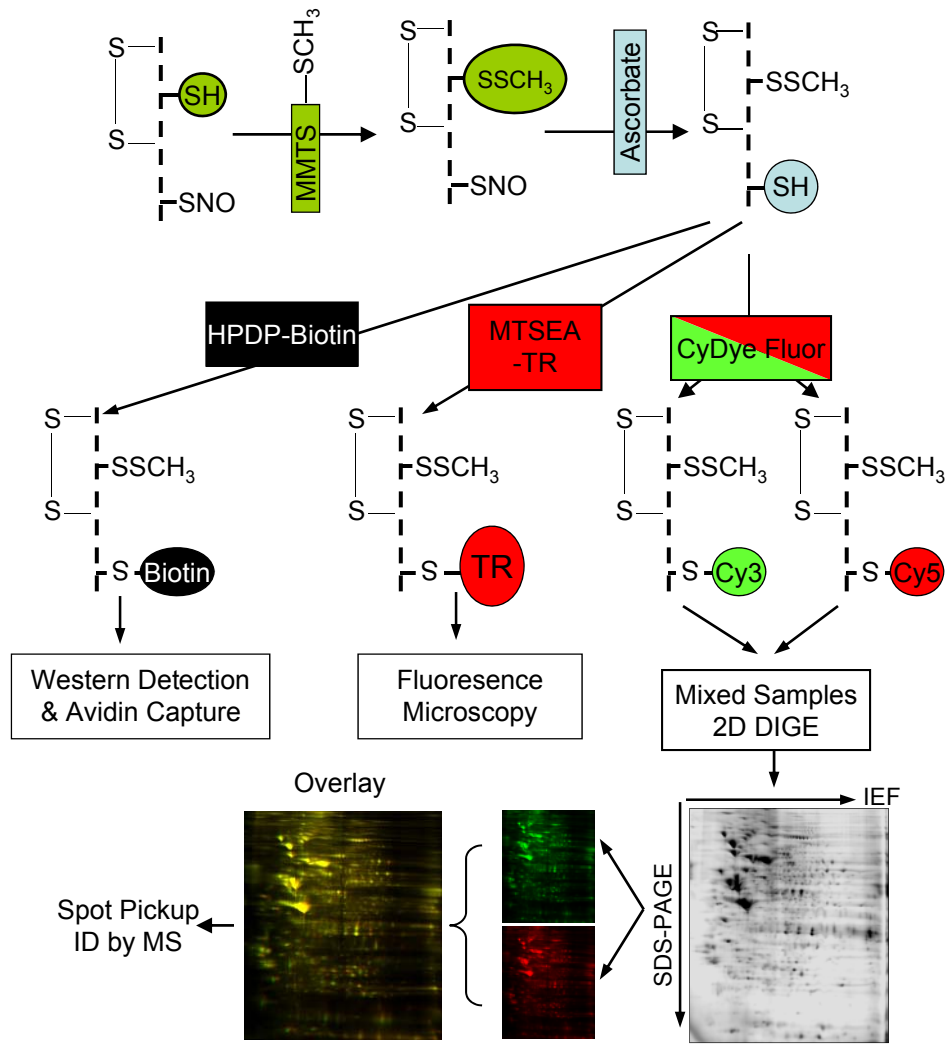

**Fig. 2: Cyde switch, two dimensional fluorescence difference gel electrophoresis (2D-DIGE) analysis of nitrosoproteins by E2 in human umbilical vein endothelial cells (HUVEC).** As a supplement for figure 6 and table 1, black and white images shown fluorescent signals from the red and green channels of all three experiments are shown. The spots circled and numbered represents 58 nitrosoproteins as listed in table 1. Ratios (E2/control) in signal intensities for each spot were calculated for statistical analysis.

Fig. 2

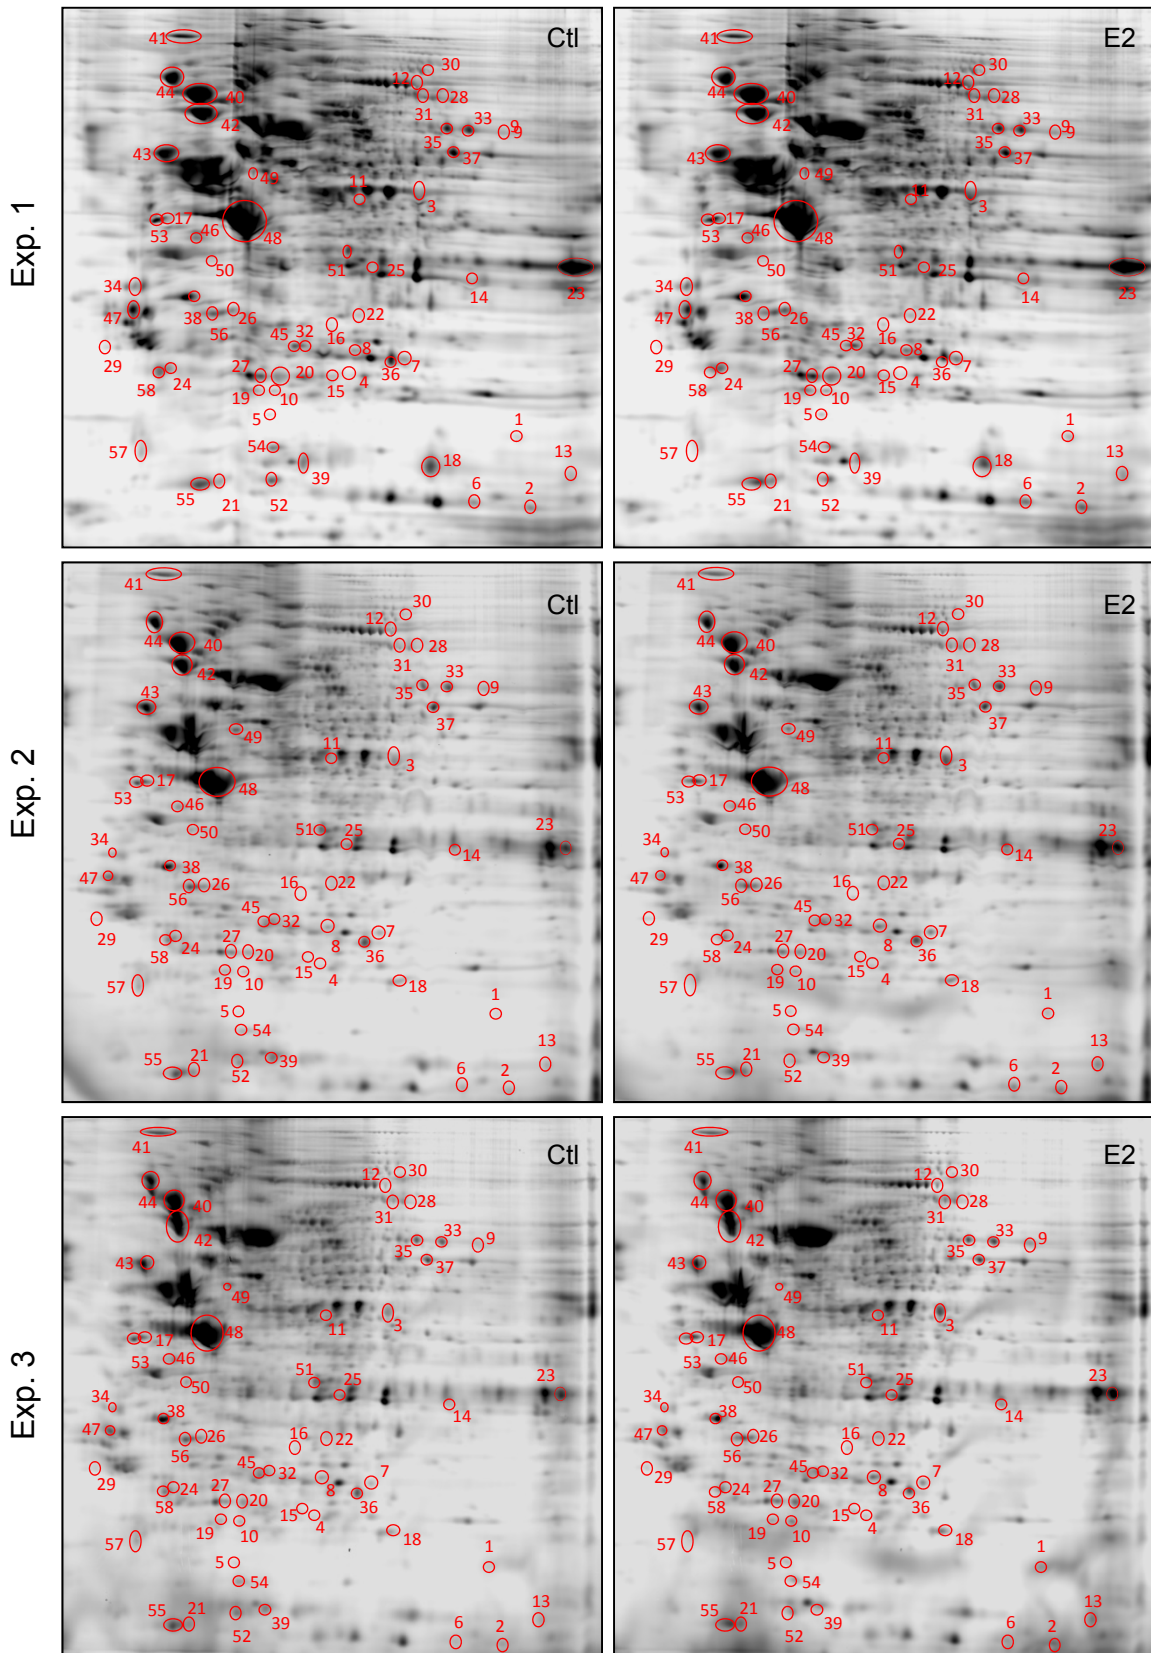

**Table 1:** Matched Peptide list in protein identification via Matrix assisted laser desorption/ionization-time of flight (MALDI-TOF)/tandam mass spectrometry

| Spot #., Protein Name                                            | # Pep Matched | Peptides Matched                                                                                                                                                                                                                                              |
|------------------------------------------------------------------|---------------|---------------------------------------------------------------------------------------------------------------------------------------------------------------------------------------------------------------------------------------------------------------|
| 1. Ubiquitin C (UBC)                                             | 5             | EGIPPDQQR<br>ESTLHLVLR<br>TLDYNIQK<br>IQDKEGIPPDQQR<br>TITLEVEPSDTIENVK                                                                                                                                                                                       |
| 2. Peptidylprolyl isomerase A (PPIA)                             | 9             | VSFELFADK<br>FEDENFILK<br>EGMNIVEAMER<br>GFGYKGSFHR<br>VSFELFADKVPK<br>VKEGMNIVEAMER<br>IIPGFMCQGGDFTR<br>SIYGEKFEDENFILK<br>VNPTVFFDIAVDGEPLGR                                                                                                               |
| 3. Enolase 1 (ENO1)                                              | 13            | SGKYDLDFK<br>IGAEVYHNLK<br>LMIEMDGTENK<br>GNPTVEVDLFTSK<br>YISPDQLADLYK<br>LAQANGWGVMSHR<br>VVIGMDVAASEFFR<br>AAVPSGASTGIYEALER<br>LAMQEFMILPVGAANFR<br>DATNVGDEGGFAPNILENK<br>FTASAGIQVVGDDLTVTNPK<br>DYPVVSIEDPFDQDDWGAWQK<br>HIADLAGNSEVILPVPFNVINGGSHAGNK |
| 4. Proteasome (prosome, macropain) subunit, beta type, 3 (PSMB3) | 7             | DAVSGMGVIVHIEK<br>FGIQAQMVTTDFQK<br>FGPYTEPVIAGLDPK<br>RFGIQAQMVTTDFQK<br>RFGPYTEPVIAGLDPK<br>DAVSGMGVIVHIEKDK<br>LYIGLAGLATDVQTVQQR                                                                                                                          |
| 5. Adenine phosphoribosyl Transferase (APRT)                     | 6             | IDYIAGLDSR<br>DISPVLKDPASFR<br>SFPDFPTPGVVFR<br>LAPVPFFSLLQYE<br>AELEIQKDALEPGQR<br>LPGPTLWASYSLEYGK                                                                                                                                                          |
| 6. Peptidylprolyl isomerase A (PPIA)                             | 9             | VSFELFADK<br>FEDENFILK<br>EGMNIVEAMER<br>GFGYKGSFHR<br>VSFELFADKVPK<br>VKEGMNIVEAMER<br>IIPGFMCQGGDFTR<br>SIYGEKFEDENFILK<br>VNPTVFFDIAVDGEPLGR                                                                                                               |
| 7. Triosephosphate isomerase 1 (TPI1)                            | 14            | FFVGGNWK<br>KFFVGGNWK<br>SNVSDAVAQSTR<br>FFVGGNWKMNGR<br>QSLGELIGTLNAAK<br>HVFGESEDELIGQK<br>TATPQQAQEVHEK<br>DCGATWVVLGHSER<br>KQSLGELIGTLNAAK<br>VVLAYEPVWAIGTGK<br>RHVFGESEDELIGQK<br>VTNGAFTGEISPGMIK<br>VPADTEVVCAPPTAYIDFAR                             |

|                                                             |    |                                                                                                                                                                                                                                                                                                                                                                |
|-------------------------------------------------------------|----|----------------------------------------------------------------------------------------------------------------------------------------------------------------------------------------------------------------------------------------------------------------------------------------------------------------------------------------------------------------|
|                                                             |    | ELASQPVDVGGFLVGGASLKPEFVDIINAK                                                                                                                                                                                                                                                                                                                                 |
| 8.Peroxiredoxin 6 (PRDX6)                                   | 13 | VVVFVFGPDK<br>AAKLAPEFAK<br>RVATPVDWK<br>LPFPIDDR<br>VVVFVFGPDKK<br>LSILYPATTGR<br>VVISLQLTAEKR<br>DFTPVCTTELGR<br>DGDSVMVLPTIPEEEAK<br>ELAILLGMMLDPAEKDEK<br>LIALSIDSVEDHLAWSK<br>FHDFLGDWSGILFHSR<br>PGGLLLGDVAPNFEANTTVGR                                                                                                                                   |
| 9.Transketolase (TKT)                                       | 18 | KAYGQALAK<br>HQPTAIIAK<br>NSTFSEIFK<br>ESWHGKPLPK<br>NSTFSEIFKK<br>ISSDLDGHPVPK<br>LDNLVAILDINR<br>KISSDLDGHPVPK<br>VLDPFTIKPLDR<br>MFGIDRDAIAQAVR<br>TVPFCSTFAAFFTR<br>SVPTSTVFYPSDGVATEK<br>GITGVEDKESWHGKPLPK<br>ILATPPQEDAPSVDIANIR<br>LGQSDPAPLQHQMIDIYQK<br>TSRPNIAIYNNNEDFQVGQAK<br>SKDDQVTIGAGVTLHEALAAELLK<br>ILTVEDHYEGGIGEAVSSAVVGEPIGIVTHLA<br>VNR |
| 10.Peroxiredoxin 2 (PRDX2)                                  | 7  | IGKPAPDFK<br>ATAVVDGAFK<br>LSEYGVVK<br>RLSEYGVVK<br>QITVNDLPVGR<br>EGGLGPLNIPLADVTR<br>KEGGLGPLNIPLADVTR                                                                                                                                                                                                                                                       |
| 11.Eukaryotic translation elongation factor 1 gamma (EEF1G) | 16 | QAFPNTNR<br>QVLEPSFR<br>STFVLDEFK<br>ILGLLDAYLK<br>AKDPFAHLPK<br>STFVLDEFKR<br>RILGLLDAYLK<br>ALIAAQYSGAQVR<br>LDPGSEETQTLVR<br>DGWSLWYSEYR<br>WFLTCINQPQFR<br>KLDPGSEETQTLVR<br>EYFSWEGAFQHVVK<br>VLSAPPHFHGQTNR<br>YSNEDTSLVALPYWEHFDK<br>GQELAFPLSPDWQVDYESYTWR                                                                                             |
| 12.Eukaryotic translation elongation factor (EEF2)          | 21 | GGGQIIPAR<br>GEGQLGPAER<br>GPLMMYISK<br>VFDAIMNFK<br>QFAEMYVAK<br>VNFTVDQIR<br>VFSGLVSTGLK<br>YEWVDAEAR<br>EDLYLKPIQR<br>NMSVIAHVDHGK<br>DSVVAGFQWATK<br>KEDLYLKPIQR<br>EGIPALDNFLDKL                                                                                                                                                                          |

|                                                                   |    |                                                                                                                                                                                                                                                                                                 |
|-------------------------------------------------------------------|----|-------------------------------------------------------------------------------------------------------------------------------------------------------------------------------------------------------------------------------------------------------------------------------------------------|
|                                                                   |    | TGTITTFEHAHNMR<br>AYLPVNESFGFTADLR<br>GHVFEEQVAGTPMFVVK<br>RGHVFEESQVAGTPMFVVK<br>ARPPFDGLAEDIDKGEVSAR<br>STAISLFYELSENDLNFILK<br>ALLELQLEPEELYQTFQR<br>DGAGFLINLIDSPGHVDFSSSEVTAALR                                                                                                            |
| 13.Cofilin 1(CFL1)                                                | 7  | MLPDKDCR<br>YALYDATYETK<br>LGGSAVISLEGKPL<br>HELQANCYEEVKDR<br>KEDLVFIFWAPESAPLK<br>EILVGDVGGQTVDDPYATFVK<br>NIILEEGKEILVGDVGGQTVDDPYATFVK                                                                                                                                                      |
| 14.Annexin A2 (ANXA2)                                             | 17 | WISIMTER<br>AYTNFDAER<br>STVHEILCK<br>QDIAFAYQR<br>TPAQYDASELK<br>TNQELQEINR<br>DIISDTSGDFRK<br>SLYYIQQDTK<br>SYSPYDMLESIR<br>GVDEVTIVNILTNR<br>SYSPYDMLESIRK<br>SALSGHLETVILGLLK<br>TDLEKDIISDTSGDFR<br>LSLEGDHSTPPSAYGSVK<br>AEDGGSVIDYELIDQDAR<br>RAEDGGSVIDYELIDQDAR<br>AYTNFDAERDALNIETAIK |
| 15.Parkinson disease (autosomal recessive, early onset) 7 (PARK7) | 7  | EILKEQENR<br>VEKDGILTSR<br>MMNGGHYTYSENK<br>GAEEMETVIPVDVMR<br>MMNGGHYTYSENKVEK<br>GPGTSFEFALAIVEALNGK<br>EGPYDVVVLPGGNLGAQNLSESAVK                                                                                                                                                             |
| 16.Glutathione S-transferase omega 1 (GSTO1)                      | 11 | MILEFSK<br>LEEVLTKK<br>VPSLVGSFIR<br>HEVININLK<br>LLPDDPYEK<br>LKLWMAAMK<br>NKPEWFFK<br>KLLPDDPYEK<br>GSAPPGPVPEGSIR<br>EDYAGLKEEFR<br>EFTKLEEVLTNK                                                                                                                                             |
| 17.Lectin, galactoside-binding, soluble, 3 (LGALS3)               | 10 | SDGIYIINLK<br>FAAATGATPIAGR<br>KSDGIYIINLK<br>GAHSVGLMWWMLAR<br>FTPGFTFNQQAQAFR<br>AIVAIENPADVSVISSR<br>EHPWEVMPDLYFYR<br>FTPGFTFNQQAQAFREPR<br>FLAAGTHLGGTNLDFQMEQYIYK<br>EHPWEVMPDLYFYRDPPEIEK                                                                                                |
| 18.Transgelin 2 (TAGLN2)                                          | 12 | DVGRPQPGR<br>IQASTMAFK<br>ENFQNWLK<br>KDVGRPQPGR<br>NVIGLQMGNTNR<br>TLMNLGGLAVAR<br>NFSNQLQEGK<br>GASQAGMTGYGMPR<br>DDGLFSGDPNWFVK<br>QMEQISQFLQAAER                                                                                                                                            |

|                                                                               |    |                                                                                                                                                                                                                                                                  |
|-------------------------------------------------------------------------------|----|------------------------------------------------------------------------------------------------------------------------------------------------------------------------------------------------------------------------------------------------------------------|
|                                                                               |    | YGINTTDFQTVDLWEGK<br>DGTVLCELINALYPEGQAPVK                                                                                                                                                                                                                       |
| 19.RNA binding motif protein 8A (RBM8A)                                       | 5  | FAEYGEIK<br>NIHLNLDR<br>NIHLNLDLR<br>GYTLVEYETK<br>MREDYDSVEQDGDDEPGPQR                                                                                                                                                                                          |
| 20.Glutathione S-transferase pi 1 (GSTP1)                                     | 6  | MLLADQGQSWK<br>PPYTVVYFPVR<br>EEVTVETWQEGSLK<br>FQDGDLTLYQSNTILR<br>DQQEAALVDMVNDGVEDLR<br>ALPGQLKPFETLLSQNQGKK                                                                                                                                                  |
| 21.Eukaryotic translation initiation factor 5A (EIF5A)                        | 7  | VHLVGIDIFTGK<br>EDLRLPEGDLGK<br>VHLVGIDIFTGKK<br>LPEGDLGKEIEQK<br>NDFQLIGIQDGYLSLLQDSGEVR<br>RNDFQLIGIQDGYLSLLQDSGEVR<br>MADDLDFETGDAGASATFPMQCSALR                                                                                                              |
| 22.Nucleoside phosphorylase (NP)                                              | 15 | LVFGFLNGR<br>VFGFSLITNK<br>ANHEEVLAAGK<br>FPAMSDAYDR<br>FEVGDIMLIR<br>VIMDYESLEK<br>NTAEWLLSHTK<br>FHMYEGYPLWK<br>FGDRFPAMSDAYDR<br>DHINLPGFSGQNPLR<br>LGADAVGMSTVPEVIVAR<br>LEQFVSILMASIPLPK<br>LVFGFLNGRACVMMQGR<br>LTQAQIFDYGEIPNFPR<br>VFHLLGVDLTVTNAAGGLNPK |
| 23.Glyceraldehyde-3-phosphate dehydrogenase (GAPDH)                           | 9  | GALQNIIPASTGAAK<br>VPTANVSVVDLTCR<br>LVINGNPITIFQER<br>LISWYDNEFGYSNR<br>LVINGNPITIFQERDPSK<br>VIISAPSADAPMFVGMGNHEK<br>WGDAGAEYVVESTGVFTTMEK<br>RVIISAPSADAPMFVGMGNHEK<br>VIHDFNGIVEGLMTTVHAITATQK                                                              |
| 24.Proteasome (prosome, macropain) subunit, beta type, 6 (PSMB6)              | 5  | ITTTGSIANR<br>QVLLGDQIPK<br>LAAIAESGVER<br>VTDKLTPIHDR<br>QSFAIGSGSSYIYGYVDATYR                                                                                                                                                                                  |
| 25.Annexin A1 (ANXA1)                                                         | 10 | DITSDTSGDFR<br>TPAQFDADEL<br>GVDEATIIDLTK<br>GVDEATIIDLTKR<br>ALTGHLEEVLLALK<br>GLGTDEDTLIEILASR<br>AAYLQETGKPLDETLK<br>AAYLQETGKPLDETLKK<br>QAWFIENEEQEYVQTVK<br>GGPGSAVSPYPTFNPSSDVAALHK                                                                       |
| 26.Chloride intracellular channel 1 (CLIC1)                                   | 8  | YLSNAYAR<br>IGNCPFSQR<br>GFTIPEAFR<br>LFMVLWLK<br>GVTFNVTTVDTK<br>LAALNPESNTAGLDIFAK<br>EEFASTCPDDEEIELAYE<br>VLDNYLTSPLPEEVDETSAEDEGVSR                                                                                                                         |
| 27.ATP synthase, H+ transporting, mitochondrial F0 complex, subunit d (ATP5H) | 11 | AGLVDDFEK<br>SWNETLTSR<br>SCAEWVSLSK                                                                                                                                                                                                                             |



|                                                                 |    |                                                                                                                                                                                                                                                                                                                                                                                                                                                           |
|-----------------------------------------------------------------|----|-----------------------------------------------------------------------------------------------------------------------------------------------------------------------------------------------------------------------------------------------------------------------------------------------------------------------------------------------------------------------------------------------------------------------------------------------------------|
|                                                                 |    | AGLVDDFEKK<br>IVEYEKEMEK<br>YPYWPHQPIENL<br>YTAQVDAEEKEDVK<br>KYPYWPHQPIENL<br>TIDWVAFAEIIPQNQK<br>LAALPENPPAIDWAYYK<br>NLIPFDQMTIEDLNEAFPETK                                                                                                                                                                                                                                                                                                             |
| 28.Phosphofructokinase, platelet (PFKP)                         | 18 | VTILGHVQR<br>FLEHLSGAGK<br>KQDFEHR<br>TFVLEVMGR<br>SFAGNLNTYK<br>KFLEHLSGAGK<br>YLEEIATQMR<br>NVIFQPVAELK<br>EWSGLLEELAR<br>ELVVTQLGYDTR<br>DLQSNVEHLTEK<br>KEWSGLLEELAR<br>MLAIYDGFDFGFAK<br>IKELVVTQLGYDTR<br>AIGVLTSGGDAQMNAAVR<br>NVLGHMQQGGAPSPFDR<br>IIEVVDAIMTTAQSHQR<br>ASYDVSDSGQLEHVQPWSV                                                                                                                                                       |
| 29.Eukaryotic translation initiation factor 6 (EIF6)            | 5  | NSLPDTVQIR<br>LNEAQPSTIATSMR<br>ETEEILADV LKVEVFR<br>HGLLVPNNTDQELQHIR<br>TSIEDQDELSSLLQVPLVAGTVNR                                                                                                                                                                                                                                                                                                                                                        |
| 30.Staphylococcal nuclease and tudor domain containing 1 (SND1) | 25 | QINLSNIR<br>VLSGCAIIVR<br>EGLVMVEVR<br>QFLPFLQR<br>GLATVIRYR<br>FVDGEWYR<br>LGTLSPAFSTR<br>ADDADEFYYSR<br>TIHLSSIRPPR<br>IHVFYIDYGNR<br>DTPDEPWAFPAR<br>SEAVVEYVFSGSR<br>SSHYDELLAAEAR<br>VITEYLNAQESAK<br>LIGKEVCFTIENK<br>KGMWSEGNNGSHTIR<br>EADGSETPEPFAAEAK<br>NDIASHPPVEGSYAPR<br>LRPLYDIPYMFEAR<br>ANNPEQNR LSECEEQAK<br>HFVDSHHQKPVNAIIEHVR<br>NLPGLVQEGEPFSEATLFTK<br>VWAHYEEQPVEEVMPLVEEK<br>VLPQAQATEYAFAFIQVPQDDDA<br>VNVTVDYIRPASPATETVPAFSEK |
| 31.DEAD (Asp-Glu-Ala-Asp) box polypeptide 1 (DDX1)              | 11 | MDQAIIFCR<br>WQMNPYDR<br>ELLIIGGVAAR<br>DLGLAFEIPPHMK<br>FNFGEIEEFKPPK<br>GHVDILAPTQELAALEK<br>DQLSVLENGVDIVGTGPR<br>DNTRPGANSPMWSEAIK<br>GIDIHGVPYVINVTLPEK<br>EAQTSFLHLGYLPNQLFR<br>FLVLDEADGLLSQGYSDFINR                                                                                                                                                                                                                                               |
| 32.Heat shock 27kDa protein 1 (HSPB1)                           | 11 | DWYPHSR<br>GPSWDPFR<br>RVPFLLR                                                                                                                                                                                                                                                                                                                                                                                                                            |

|                                                                    |    |                                                                                                                                                                                                                                                                                                                                                                                                                     |
|--------------------------------------------------------------------|----|---------------------------------------------------------------------------------------------------------------------------------------------------------------------------------------------------------------------------------------------------------------------------------------------------------------------------------------------------------------------------------------------------------------------|
|                                                                    |    | QLSSGVSEIR<br>QDEHGYISR<br>LFDQAFGLPR<br>HEERQDEHGYISR<br>QLSSGVSEIRHTADR<br>VSLDVNHFADELTVK<br>GPSWDPFRDWYPHSR<br>LATQSNITIPVTFESR                                                                                                                                                                                                                                                                                 |
| 33. Transketolase (TKT)                                            | 11 | NSTFSEIFKK<br>LDNLVAILDINR<br>VLDPFTIKPLDR<br>TVPFCSTFAAFFTR<br>SVPTSTVFYPSDGVATEK<br>GITGVEDKESWHGKPLPK<br>ILATPPQEDAPSVDIANIR<br>LGQSDPAPLQHQMDIYQK<br>TSRPENAIYNNNEDFQVQAK<br>SKDDQVTVIGAGVTLHEALAAELLK<br>ILTVEDHYEGGIGEAVSSAVGEPGITVTHLA<br>VNR                                                                                                                                                                |
| 34. Proliferating cell nuclear antigen (PCNA)                      | 7  | SEGFDTYR<br>FSASGELGNNGIK<br>NLAMGVNLTSMK<br>AEDNADTLALVFEAPNQEK<br>ATPLSSTVTLMSADVPLVVEYK<br>LMDLDVEQLGIPEQEYSCVVK<br>LSQTSNVDKKEEAVTIEMNEPVQLTFALR                                                                                                                                                                                                                                                                |
| 35. Far upstream element (FUSE) binding protein 1 (FUBP1)          | 22 | LLDQIVEK<br>AWEEYK<br>SVMTEYK<br>EMVLELIR<br>IAQITGPPDR<br>AWEEYKK<br>GTPQQIDYAR<br>VPDGMVGFIIGR<br>SVQAGNPGGPGGGR<br>IGGNEGIDVPIPR<br>RPLEDGDQPDAK<br>IQIAPDSGGLPER<br>RPLEDGDQPDAKK<br>IQFKPDDGTTPER<br>MVMIQDGPQNTGADKPLR<br>IGGDAGTSLNSNDYGYGGQK<br>SVMTEYKVPDGMVGFIIGR<br>IQQESGCKIQIAPDSGGLPER<br>VAPQNDSTLPPMHQQQSR<br>QQAAAYAQTSPQGMPPHPPAPQGG<br>GRPAPGFHHGDGPGNAVQEIMIPASK<br>MGQAVPAPTAPPGGQPDYSAAWAEYYR |
| 36. Proteasome (prosome, macropain) subunit, alpha type, 2 (PSMA2) | 11 | RLTPTEVK<br>AANGVVLATEK<br>SVHKVEPITK<br>GYSFSLTTFSPSGK<br>LTPTEVKDYLAIA<br>HIGLVYSGMGPDYR<br>LVQIEYALAAVAGGAPSVGIK<br>YNEDLEDAIHTAILTK<br>RYNEDLEDAIHTAILTK<br>LAQQYYLVYQEPIPTAQLVQR<br>KLAQQYYLVYQEPIPTAQLVQR                                                                                                                                                                                                     |
| 37. Pyruvate kinase (PKM2)                                         | 18 | IENHEGVR<br>MMIGRCNR<br>GDYPLEAVR<br>ASDVHEVRK<br>GDLGIEPAEK<br>ITLDNAYMEK<br>LDIDSPITAR<br>IYVDDGLISLQVK<br>DPVQEAWAEDVDLR<br>FDEILEASDGIMVAR                                                                                                                                                                                                                                                                      |

|                                                                             |    |                                                                                                                                                                                                                                                                                                                                                                 |
|-----------------------------------------------------------------------------|----|-----------------------------------------------------------------------------------------------------------------------------------------------------------------------------------------------------------------------------------------------------------------------------------------------------------------------------------------------------------------|
|                                                                             |    | GADFLVTEVENGGSLGSK<br>RFDEILEASDGIMVAR<br>FGVEQDVMVFASFIR<br>LNFSHGTHEYHAETIK<br>EAEAAIYHLQLFEELR<br>EAEAAIYHLQLFEELRR<br>LAPITSDPTEATAVGAVEASFK<br>TATESFASDPILYRPVAVALDTK                                                                                                                                                                                     |
| 38. Annexin A5 (ANXA5)                                                      | 15 | FITIFGTR<br>VLTEIIASR<br>LYDAYELK<br>SEIDLFNIR<br>LIVALMKPSR<br>GAGTDDHTLIR<br>SEIDLFNIRK<br>NFATSLYSMIK<br>GTVTDFPGFDER<br>ETSGNLEQLLAVVK<br>GLGTDEESILLLTSR<br>SIPAYLAETLYYAMK<br>WGTDEEKFITIFGTR<br>YMTISGFQJEEIDR<br>QVYEEYGSSELEDDVVGDTSGYYQR                                                                                                              |
| 39. Cofilin 1 (CFL1)                                                        | 4  | YALYDATYETK<br>LGGSAVISLEGKPL<br>KEDLVFIFWAPESAPLK<br>NIILEEGKEILVGDVGTVDVDPYATFVK                                                                                                                                                                                                                                                                              |
| 40. Heat shock protein 90kDa alpha (cytosolic), class A member 1 (HSP90AA1) | 19 | APFDLFENR<br>HIYYITGETK<br>DQVANSFVER<br>APFDLFENRK<br>TDTGEPMGRGTK<br>RAPFDLFENR<br>EDQTEYLEER<br>DNSTMGYMAAKK<br>HFSVEGQLEFR<br>GVVDSDELPLNISR<br>SLTNDWEDHLAVK<br>HSQFIGYPITLFVEK<br>HLEINPDHSIETLR<br>NPDDITNEEYGEFYK<br>KHLEINPDHSIETLR<br>VILHLKEDQTEYLEER<br>HNDDEQYAWESSAGGSFTVR<br>RVFIMDNCEELIPEYLNFR                                                 |
| 41. Thrombospondin 1 (THBS1)                                                | 20 | FYVVMWK<br>GFLLLASLR<br>GPDPSPAFR<br>SITLQVQEDR<br>TIVTTLQDSIR<br>LCNNPTPQFGGK<br>GTSQNDPNWVVR<br>FVFGTTPEDILR<br>NALWHTGNTPGQVR<br>DNCQYVYNVDQR<br>QVTQSYWDTNPTR<br>GGVNDNFQGVLQNVK<br>CNYLGHYSDFMYR<br>DDYAGVFVFGYQSSSR<br>MENAELDVPIQSVFTR<br>FTGSQPFQGVVEHATANK<br>QHVVSVVEALLATGQWK<br>CENTDPGYNCLPCPPR<br>DLQAICGISCDELSSMVLELR<br>IEDANLIPPVDDKFQDLVDAVR |
| 42. Heat shock 70kDa protein 5 (glucose-regulated protein, 78kDa) (HSPA5)   | 26 | LTPEEIER<br>ALSSQHQR<br>ITITNDQNR<br>VYGERPLTK<br>EFFNGKEPSR                                                                                                                                                                                                                                                                                                    |

|                                                               |    |                                                                                                                                                                                                                                                                                                                                                                                                      |
|---------------------------------------------------------------|----|------------------------------------------------------------------------------------------------------------------------------------------------------------------------------------------------------------------------------------------------------------------------------------------------------------------------------------------------------------------------------------------------------|
|                                                               |    | DAGTIAGLNVMR<br>VEIIANDQGNR<br>FEELNMDLFR<br>NELESYAYSLK<br>ELEEVQPIISK<br>TWNDPVQQDIK<br>SDIDEIVLVGGSTR<br>AKFEELNMDLFR<br>TFAPEISAMVLTK<br>ITPSYVAFTPEGER<br>KSDIDEIVLVGGSTR<br>TKPYIQVDIGGGQTK<br>NQLTSNPENTVFDK<br>IINEPTAAAIAYGLDKR<br>VTHAVVTVPAYFNDAQR<br>DNHLLGTFDLTGIPPAPR<br>IEWLESHQDADIEDFK<br>GVPQIEVTFEIDVNGILR<br>KVTHAVVTVPAYFNDAQR<br>IEIESFYEGEDFSETLTR<br>LYGSAGPPPTGEEDTAEKDEL   |
| 43. Prolyl 4-hydroxylase, beta polypeptide (P4HB)             | 17 | LEFFGLK<br>QLAPIWDK<br>LKAEGSEIR<br>TVIDYNGER<br>THILLFLPK<br>SNFAEALAAHK<br>EADDIVNWLK<br>NFEDVAFDEK<br>NFEDVAFDEKK<br>YQLDKDGVVLFK<br>YKPESEELTAER<br>LGETYKDHENIVIAK<br>VDATEESDLAQQYGVR<br>ILFIFIDSDHTDNQR<br>HNQLPLVIEFTEQTAPK<br>NNFEGEVTKENLLDFIK<br>QFLQAAEAIDIPFGITSNSDVFSK                                                                                                                 |
| 44. Heat shock protein 90kDa beta (Grp94), member 1 (HSP90B1) | 22 | KTFEINPR<br>GLFDEYGSK<br>YFMAGSSR<br>FAFQAEVNR<br>LGVIEDHSNR<br>EAESSPFVER<br>SILFVPTSAPR<br>KEAESSPFVER<br>DISTNYYASQK<br>EFEPLLNWMK<br>GVVDSDDLPLNVSR<br>NLLHVTDTGVGMTR<br>IADDKYNDTFWK<br>VFITDDFHDMMMPK<br>RVFITDDFHDMMMPK<br>EEEEAIQLDGLNASQIR<br>EAVEKEFEPLLNWMK<br>FQSSHPTDITSLDQYVER<br>ESDDPMAYIHFTAEGEVTFK<br>TVWDWELMNDIKPIWQRPSK<br>TDDEVVQREEEAIQLDGLNASQIR<br>LTESPCALVASQYGWSGNMERIMK |
| 45. Heat shock 27kDa protein 1 (HSPB1)                        | 11 | DWYPHSR<br>GPSWDPFR<br>RVPFLLR<br>QDEHGYISR<br>LFDQAFGLPR<br>DGVVEITGKHEER<br>HEERQDEHGYISR<br>VSLDVNHFAPELTVK<br>GPSWDPFRDWYPHSR<br>LATQSNIEITPVTFESR                                                                                                                                                                                                                                               |

|                                                                |    |                                                                                                                                                                                                                                                                                                                                                                                       |
|----------------------------------------------------------------|----|---------------------------------------------------------------------------------------------------------------------------------------------------------------------------------------------------------------------------------------------------------------------------------------------------------------------------------------------------------------------------------------|
|                                                                |    | KYTLPPGVDPTQVSSSLSPGTLTVEAMPK                                                                                                                                                                                                                                                                                                                                                         |
| 46.Heterogeneous nuclear ribonucleoprotein C (C1/C2) ( HNRNPC) | 7  | VPPPPPIAR<br>GDDQLELIK<br>YGKIVGCSVHK<br>GFAFVQYVNER<br>QKVDLSLENLEK<br>MIAGQVLDINLAAEPK<br>SAAEMYGSSFDLDYDFQR                                                                                                                                                                                                                                                                        |
| 47.Tropomyosin 4 (TPM4)                                        | 14 | HIAEEADR<br>AEGDVAALNR<br>HIAEEADRK<br>MEIQEMQLK<br>LVILEGELER<br>IQLVEEELDR<br>EKAEGDVAALNR<br>KLVILEGELER<br>RIQLVEEELDR<br>IQALQQADEAEDR<br>LVILEGELERAEEER<br>IQLVEEELDRAQER<br>KIQALQQADEAEDREENVGLHQLDQTLNE<br>LNCI                                                                                                                                                             |
| 48.Actin, beta (ACTB)                                          | 12 | AGFAGDDAPR<br>GYSFTTAEER<br>HQGVMVGMGQK<br>AVFPSIVGRPR<br>IWHHTFYNELR<br>SYELPDGQVITIGNER<br>YPIEHGIVTNWDDMEK<br>VAPEEHPVLLTEAPLNPK<br>DLYANTVLSGGTTMYPGIADR<br>KDLYANTVLSGGTTMYPGIADR<br>DLYANTVLSGGTTMYPGIADRMQK<br>TTGIVMDSGDGVTHTVPIYEGYALPHAILR                                                                                                                                  |
| 49. Keratin 7 (KRT7)                                           | 25 | NEISEMNR<br>LDADPSLQR<br>LQAEIDNIK<br>WTLQEQK<br>KLLEGEESR<br>FETLQAQAGK<br>YEDEINRR<br>SAYGGPVGAGIR<br>EYQELMSVK<br>NKYEDEINR<br>QEELEAALQR<br>AEAEAWYQTK<br>TAAENEFVVLK<br>GQLEALQVDGGR<br>VRQEESEQIK<br>SLDLGIIAEVK<br>LALDIEIATYR<br>TAAENEFVVLKK<br>AKQEELEAALQR<br>QEELEAALQRAK<br>VDALNDEINFLR<br>LPDIFEAQIAGLR<br>TMQDVVEDFKNK<br>EVTINQSLAPLR<br>TLNETELTELQSQISDTSVVLMSMNSR |
| 50.SEC13 homolog ( <i>S. cerevisiae</i> ) ( SEC13)             | 4  | LEAHSWVR<br>NGGQILIADLR<br>LWKEEEDGQWK<br>EEQKLEAHSWVR                                                                                                                                                                                                                                                                                                                                |
| 51.Annexin A1 (ANXA1)                                          | 15 | SEIDMNDIK<br>DITSDTSGDFR<br>TPAQFDAELR<br>GVDEATIIDLTK<br>GVDEATIIDLTKR<br>GTDVNVFNTILTTR                                                                                                                                                                                                                                                                                             |

|                                                                |    |                                                                                                                                                                                         |
|----------------------------------------------------------------|----|-----------------------------------------------------------------------------------------------------------------------------------------------------------------------------------------|
|                                                                |    | ALTGHEEVVLLLK<br>KGTDVNVFNILTTR<br>GLGTDEDTLIEILASR<br>SEDFGVNEDLADSDAR<br>AAYLQETGKPLDETLK<br>AAYLQETGKPLDETLKK<br>GDRSEDFGVNEDLADSDAR<br>QAWFIENEQEYVQTVK<br>GGPGSAVSPYPTFNPSSDVAALHK |
| 52.Stathmin 1/ oncoprotein 18 (STMN1)                          | 10 | KLEAAEER<br>DKHIEEVR<br>KSHEAEVLK<br>DLSLEEIQK<br>EHEKEVLQK<br>AIEENNFSSK<br>DLSLEEIQKK<br>ESVPEFPLSPPK<br>ASGQAFELILSPR<br>MASSDIQVKELEK<br>SKESVPEFPLSPPK<br>RASGQAFELILSPR           |
| 53.Lectin, galactoside-binding, soluble, 3 (LGALS3)            | 9  | SDGIYIINLK<br>FAAATGATPIAGR<br>KSDGIYIINLK<br>GAHSVGLMWWMLAR<br>FTPGTFTNQIAAFR<br>AIVAIENPADVSVISSR<br>EHPWEVMPDLYFYR<br>FTPGTFTNQIAAFREPR<br>FLAAGTHLGGTNLDFQMEQYIYK                   |
| 54.Non-metastatic cells 1, protein (NM23A) expressed in (NME1) | 9  | GLVGEIIR<br>GDFCIQVGR<br>DRPFFAGLVK<br>FMQASEDLLK<br>TFIAIKPDGVQR<br>NIIHGSDSVESAEK<br>VMLGETNPADSKPGTIR<br>FMQASEDLLKEHYVDLK<br>YMHSGPVVAMVWEGLNVVK                                    |
| 55.Eukaryotic translation initiation factor 5 (EIF5A)          | 8  | VHLVGIDIFTGK<br>EDLRLPEGDLGK<br>VHLVGIDIFTGKK<br>LPEGDLGKEIEQK<br>KYEDICPSTHNMDVPNIK<br>NDFQLIGIQDGYLSLLQDSGEVR<br>RNDFQLIGIQDGYLSLLQDSGEVR<br>MADDLDFETGDAGASATFPMQCSALR               |
| 56.Chloride intracellular channel 1 (CLIC1)                    | 8  | YLSNAYAR<br>IGNCPFSQR<br>GFTIPEAFR<br>LFMVLWLK<br>GVTFNVTVDTK<br>LAALNPESNTAGLDIFAK<br>EEFASTCPDDEEIELAYE<br>VLDNYLTSPLPEEVEDTSAEDEGVQSQR                                               |
| 57.Vimentin (VIM)                                              | 7  | LQEEMLQR<br>QDVDNASLAR<br>GTVSTNPAVKEGK<br>EEAENTLQSFR<br>NLQEAEEWYKSK<br>VESLQEEIAFLKK<br>KVESLQEEIAFLK                                                                                |
| 58.Tumor protein, translationally-controlled 1 (TPT1)          | 6  | YIKDYMK<br>LEEQRPER<br>GKLEEQRPER<br>VKPFMTGAAEQIK<br>EDGVTPYMIFFK<br>DLISHDEMFSDIYK                                                                                                    |
